# Supplementary material for: Effects of Green Manure Combined with Phosphate Fertilizer on Movement of Soil Organic Carbon Fractions in Tropical Sown Pasture
Source: MDPI journal article supplement (doi:10.3390/agronomy12051101), 2022-04-30
Supplement: s1 [file s1]

Archive with 1 entries (1 files):
- agronomy-1688113-supplementary.pdf
